# Supplementary material
Source: PubMed Central journal article supplement (PMC4387534)
Supplement: rsif20150051supp1.pdf [file rsif20150051supp1.pdf]

1 **ELECTRONIC SUPPLEMENTARY MATERIALS**

2

3 Jan W. Kruyt<sup>1,2</sup>, GertJan F. van Heijst<sup>3</sup>, Douglas L. Altshuler<sup>4</sup>, David Lentink<sup>1\*</sup>

4 <sup>1</sup>Mechanical Engineering, Stanford University, 416 Escondido Mall, Stanford, CA 94305, USA.

5 <sup>2</sup>Experimental Zoology Group, Wageningen University, P.O. Box 338, 6700 AH, Wageningen, The Netherlands.

6 <sup>3</sup>Physics Department, Eindhoven University of Technology, P.O. Box 516, 5600 MB, Eindhoven, The Netherlands.

7 <sup>4</sup>Department of Zoology, University of British Columbia, #4200-6270 University Blvd, Vancouver, BC V6T1Z4,  
8 Canada.

9

10 **Animals.** Seven male Anna's hummingbirds (*Calypte anna*), euthanized for other studies at the  
11 University of California, Riverside, were stored frozen in good condition. After careful preparation,  
12 their wings were donated to the Museum of Vertebrate Zoology at the University of California,  
13 Berkeley, and subsequently loaned from the University of California, Berkeley (CITES: US-052  
14 (A/P)) to Wageningen University (CITES: NL-004) for aerodynamic study. The wings originated  
15 from birds for which all animal procedures were approved by the Institutional Animal Care and Use  
16 Committee of the University of California, Riverside.

17

18 **Wing preparation.** The hummingbird wings were removed from the (proximal) base of the  
19 humerus and dried in fully spread position to resemble wing morphology during hovering flight. We  
20 removed minimal amounts of wing material to glue the wing base into a square plastic tube aligned  
21 with the innermost secondary feather. The square tube was mounted on a square rod attached to the  
22 variable pitch mechanism of the spinner. We then selected  $n = 5$  right wings that had least  
23 imperfections in the feathers due to wear, molt, and preparation, Supplementary Figure 1a. Each  
24 wing's out-of-center mass was carefully counterbalanced with an opposing plastic mount filled with  
25 lead fishing weights. Finally, we artificially groomed (preened) the feathers with our fingers and an

26 entomological pin to close small gaps. When necessary gaps were closed using a minimal amount of  
27 hairspray applied locally with a pin; we sprayed the solution in a cup, soaked the head of the pin in it,  
28 and applied minimal amounts with the pin to fix particular barbs.

29  
30 **Model wing design.** We confirmed similarity of the aerodynamic performance of rectangular model  
31 wings ( $AR = 3.5$ ,  $Re = 11,000$ ) and *Calypste anna* wings ( $n = 5$ , ave  $AR = 4.1$ , ave midstroke  $Re =$   
32  $14,000$ ), figure 1c. To isolate the effect of aspect ratio on revolving wing performance, we then  
33 designed a range of carbon fiber model wings. These wings vary in wing length only and have the  
34 same rectangular planform, constant chord length, and camber, supplementary figure 2. A recent  
35 analysis<sup>1</sup> predicts that stall delay on revolving wings is mediated by rotational accelerations, and that  
36 stabilization of the leading edge vortex (LEV) stops beyond a local aspect ratio  $r/c$  (local radius,  $r$ ,  
37 divided by chord,  $c$ ) between 1 and 10, close to 3. We selected aspect ratios ( $AR = 2-3-4-5-6.5-8-10$ )  
38 that sample this range and the hummingbird aspect ratio range:  $AR = 3.7 \pm 0.3 \text{ std } (n = 65)$ . The  
39 model wings were built up from two 0.2mm carbon fiber plies and had 15mm chord. We selected  
40 6% airfoil camber for good hover performance<sup>2-4</sup>, similar to hummingbird wings<sup>5</sup>. We iterated the  
41 airfoil design to ensure the wing was stiff enough and did not flutter within our measurement range.  
42 Each wing was fitted with a plastic square mount to clamp it onto the spinner and a minimally  
43 protruding hooklet at the wing base. This hooklet helped secure each model wing to the spinner with  
44 an orthodontic rubber band. We found that hummingbird wings and low aspect ratio model wings  
45 could be spun without vibration by balancing them using a counterweight (fishing leads attached to  
46 plastic mount). High aspect ratio model wings, however, vibrated due to the relatively large eccentric  
47 aerodynamic forces at the larger outward radius of gyration of the wing<sup>6</sup>. We therefore tested all  
48 model wings in pairs, which balances the aerodynamic and inertial forces such that the setup does

49 not vibrate. Each wing pair was carefully balanced by gluing small lead fishing weights at the lower  
50 surface into one of the plastic mounts.

51

52 **Wing spinner.** We designed a computer-run wing spinner to autonomously control wing tip  
53 Reynolds number,  $Re$ , (through spinning frequency) and incidence angle,  $\alpha$ , of single wings or wing  
54 pairs. Two micromotors (AXi2212/34 and AXi2208/20, Model Motors) with complementing torque  
55 ranges powered a single hollow axle, suspended with ball bearings in an aluminum housing. Through  
56 the axle ran a non-rotating, servo-actuated push-pull rod to control a variable pitch propeller  
57 mechanism fitted with square rods on which the plastic wing mounts could be clamped. The  
58 micromotors were controlled using an electronic speed controller (M-Drive-18, Motortron System  
59 Inc) and a servo board (ServoCenter 3.1, Yost Engineering). The spinner design minimized the  
60 distance between the rotation axis and the wing root,  $d$ , to 9.5mm. This offset was incorporated in  
61 our calculation of the target spinning frequencies to maintain constant wing tip Reynolds number  
62  $Re = \rho 2\pi f(R + d)c/\mu$  (air density,  $\rho$ , spinning frequency,  $f$ , wing length,  $R$ , and dynamic  
63 viscosity,  $\mu$ ). The dynamic viscosity was calculated based on the measured air temperature using  
64 Sutherland's equation<sup>7</sup>:  $\mu = \mu_0 (T_0/T)^{1.5} (T_0 + S)/(T + S)$ , (air temperature,  $T$ ,  $\mu_0 = 18.27\text{ms}^{-2}$ ,  $T_0$   
65  $= 291\text{K}$ , Sutherland's constant for air,  $S = 120\text{K}$ ). The same spinner was used during force  
66 measurements and quantitative flow visualization.

67

68 **Calibration of force measurement.** To make reliable static (time-averaged) force measurements,  
69 the spinner was mounted onto an overdamped balancing setup supported by weighing scales (Ohaus  
70 Adventurer Pro, 210g range,  $\pm 0.001\text{g}$ ), Supplementary Figure 1c. Accuracy of the torque  
71 measurement proved to be the setup's main challenge, as expected based on earlier studies<sup>8,9</sup>, and was  
72 improved greatly by automating the setup, thus minimizing the required handling between

73 measurements. Accuracy was further improved by mechanically isolating the setup on a heavy granite  
74 table supported by rubber dampers, and aerodynamically shielding the balance from the propeller  
75 wake with clear plastic cowlings rested on separate supports, Supplementary Figure 1b, c. High-  
76 frequency vibrations from the spinner were damped using rubber-plated motor suspension and  
77 averaged out using custom-built silicon oil dampers (10,000 cSt polydimethylsiloxane, Tribolub). We  
78 calibrated the force balance statically by using weights to apply lift force along the rotation axis (0.3°  
79 accuracy) and pure torque around the rotation axis. These weights were hung from wires running  
80 horizontally from the setup over pulleys with negligible friction. We applied a pure torque (without  
81 net force) by mounting a vertical arm, sticking both upward and downward, onto the spinner. One  
82 wire was connected to the upper end of the arm and another wire in the opposite direction to the  
83 lower end, to apply identical but opposing forces, resulting in a pure torque. All weights were  
84 submerged in paraffin oil (2.4 cSt, Texaco) to prevent them from swaying during the calibration. To  
85 account for coupling effects, we applied combinations of lift and torque to build a  $9 \times 9$  calibration  
86 matrix with increased resolution around zero lift and torque to accommodate low Reynolds number  
87 measurements. These calibrations were repeated five times before and after the measurements.  
88 Average calibration bias over all measurement points was 5.0% on torque and 1.0% on lift. We  
89 separately measured lift and torque generated by the rotating parts, e.g. mechanical friction in the ball  
90 bearings and aerodynamic drag on the plastic wing mounts, as well as center of gravity displacement  
91 due to servo actuation, and subtracted all these effects from the wing measurements to obtain precise  
92 aerodynamic forces.

93

94 **Force measurements.** We measured time-averaged lift and torque on wings spinning at constant  
95 Reynolds number and incidence. After a conservative 5 second settling period (determined  
96 experimentally), the measured reaction forces were sampled 100 times via USB at 5-6Hz and stored

97 by custom-built Matlab code (v2009a, Mathworks). Thin wires were connected close to the balance's  
98 central pivoting point for power supply (7.4VDC, DPS-2010PFC, Voltcraft) and motor control. The  
99 model wings were taken through a range of Reynolds numbers ( $Re = 5,000-25,000$ , stepsize 4,000)  
100 and incidence angles ( $\alpha = -3^\circ-60^\circ$ , stepsize  $1^\circ$  for  $\alpha < 20^\circ$  and  $3^\circ$  for  $\alpha \geq 20^\circ$ ). Hummingbird  
101 wings were tested at the midstroke Reynolds number during hover (ave  $Re = 14,000$ ) calculated using  
102 measured mean chords and angular velocities assuming a sinusoidal wing stroke<sup>6</sup>. The aerodynamic  
103 measurements were repeated 3 times. Every repetition consisted of an upward leg during which  
104 incidence was increased till the maximum angle of attack was attained, after which the angle of attack  
105 was reduced during the downward leg till it reached the minimum value. These three complete loops  
106 enabled us to check for hysteresis effects, which we did not find. The weighing scales measured lift  
107 forces ranging between 0.00003N and 5.73N and torques between 0.000013Nm and 0.246Nm. The  
108 torque measurement range was limited by motor power (at very high and very low  $AR$ ,  $Re$ ,  $\alpha$ ) and by  
109 measurement resolution (at very low  $AR$ ,  $Re$ ,  $\alpha$ ). We obtained 600 measurements per data point for  
110 statistical rigor. Since the setup has been calibrated for static measurements, resulting in a static  
111 transfer function that relates displacement to force, we checked if the balance attained static  
112 conditions. We used the fast Fourier transform (FFT) to compute the dynamic power present in the  
113 frequency spectrum below 1Hz (at higher frequencies the power was negligible) in both the lift  
114 (Supplementary Figure 3a, c, e.) and torque (Supplementary Figure 3b, d, f.) measurements. Based on  
115 this evaluation we disregarded the torque measurements for which the balance was unable to reach  
116 static equilibrium: at  $Re = 5,000$  and beyond  $35^\circ$  incidence (Supplementary Figure 3b, d, f.). All lift  
117 measurements were static and thus accepted, Supplementary Figure 3a, c, e. A single outlying point  
118 for the drag coefficient was marked as a dot, Supplementary Figure 4b, 5b, but removed from the  
119 Reynolds average (Figure 2).

120

121 **Force coefficients.** We calculate aerodynamic force coefficients by dividing lift by  
122  $1/2 \rho(2\pi f)^2 SR_2^2$  and drag due to torque by  $1/2 \rho(2\pi f)^2 SR_3^3$  using air density,  $\rho$ , spinning  
123 frequency,  $f$ , wing area,  $S$ , and the radii of second and third moments of area  $R_2$  and  $R_3$ , to account  
124 for the velocity gradient along the wing span<sup>6,8</sup>. Lift is defined as the force perpendicular to the  
125 stroke plane, neglecting induced flow effects. After checking for hysteresis effects, which we did not  
126 find, we averaged the 600 lift ( $C_L$ ) and drag ( $C_D$ ) coefficients measured at each incidence. Zero  
127 incidence was defined as the point of zero lift, based on the zero intercept of the  $C_L$ - $\alpha$  curve for  
128  $0.05 \leq C_L \leq 0.50$  for each wing.

129  
130 **Power factor.** To compare the aerodynamic power required for hover we compute power factor as a  
131 function of incidence,  $PF = C_L^{1.5}/C_D$ . The amount of weight that can be lifted with a unit  
132 aerodynamic power is proportional to this factor<sup>10</sup>. Power factor represents a ‘gradient’ and therefore  
133 amplifies noise in the drag coefficient. A penalized least-squares algorithm<sup>11</sup> was used to smooth the  
134 force coefficient curves versus incidence before calculating the power factor and thus limit noise.

135  
136 **Particle image velocimetry (PIV).** To quantify the velocities in the flow around the wings, we  
137 seeded the room with microscopic smoke particles illuminated by laser light captured with a phase  
138 locked camera (details are provided in Supplementary Table 1 below). We recorded 20 (model wings)  
139 or 25 (hummingbird wings) phase-locked image pairs in 2D planes along the span of the spinning  
140 wing. We automatically moved the imaging plane along the span using a linear actuator that traversed  
141 the spinner and its mounted wing through a laser sheet. Both the laser and the PIV camera were  
142 triggered when the wing passed in front of a camera, Supplementary Figure 1b, d. The laser beam  
143 was split using mirror optics to illuminate the wing and reduce shadow effects. Image pairs were  
144 cross-correlated using DaVis software (v7.4, LaVision GmbH) using a multi-pass cross-correlation

145 procedure consisting of a first pass on a 128×128 pixel grid (0% overlap) and then two passes on a  
146 finer 64×64 pixel grid (75% overlap)<sup>12</sup>. Flow measurements were made for all model wings over a  
147 range of Reynolds numbers ( $Re = 5,000-13,000-25,000$ ) and incidence angles ( $\alpha = 15^\circ-30^\circ-45^\circ$ ). One  
148 wing of *Calypte anna* was tested at its midstroke Reynolds number ( $Re = 13,000$ ) at these same three  
149 incidence angles. We made recordings at 19-22 equidistant spanwise recording stations from wing  
150 root to well beyond the tip. Step sizes for the model wings increased from 1.3 to 6.6 mm with aspect  
151 ratio; step size was 2.25 mm for the hummingbird wing. Reflections from the spinner as well as the  
152 plastic wing mounts were minimized using matte black grease (Zebraline stove polish), and the  
153 model wings were coated with matte black spray paint. During postprocessing, images from a  
154 simultaneously triggered second camera, under a 35° stereo angle, were used to correct for small  
155 trigger errors and match airfoil positions precisely to calculate the average flow field.

156  
157 **Vortex identification.** The leading edge vortices are visualized by plotting vorticity. We used a  
158 vortex detection scheme to confirm that the visually obvious vorticity concentrations are vortices  
159 using the MATLAB vortex identification code of Jones *et al.*<sup>13</sup>. This implementation of a non-linear  
160 vortex detection scheme in which the axisymmetric vortex intensity at a point P in the velocity field  
161 is defined as  $\gamma(P) = \frac{1}{N} \sum \sin(\theta_M)$  following the work of Graftieaux *et al.*<sup>14</sup>. This identification  
162 method is more robust against noise in the PIV recordings<sup>13</sup>. Vorticity concentration and high vortex  
163 identification levels overlap, demonstrating that the vorticity concentration at the leading edge are  
164 indeed a leading edge vortex for all wings tested (Supplementary Figure 8). We thus conclude that  
165 our vorticity fields are sufficiently noise-free to detect vortices based on vorticity concentration.

166  
167 **Vortex lift coefficient.** The vortex lift distribution was calculated by integrating the vorticity field to  
168 determine local circulation,  $\Gamma$ , for a fixed control area intersecting the wing at each spanwise station.

169 We omitted the area below the wing, where the laser illumination was insufficient, from the area of  
 170 integration. We cut off vorticity below a threshold level based on free-stream vorticity noise  
 171 measured in front of the wing. From the circulation we computed local vortex lift coefficients as  
 172  $C_l = 2\Gamma/Vc$  using local wing velocity,  $V$ , and chord length,  $c$ . For the hummingbird wing we used  
 173 the local wing chord in this computation. The average vortex lift integrated over the full span of each  
 174 model wing predicted 78-97% of the lift measured with the force balance for model wings at  $\alpha =$   
 175  $30^\circ$ , and 55%-109% at  $45^\circ$ ; for the hummingbird wing the calculated fraction was 71% of the  
 176 measured lift coefficient at  $30^\circ$  and 77% at  $45^\circ$ . The discrepancy between measured and calculated  
 177 lift is expected, because the control volume integral of the Navier-Stokes equations is only  
 178 approximated by integrating circulation<sup>12,15-22</sup>.

179  
 180 Table 1. Components of phase-locked PIV setup

|                                  |                                                                                                                                               |
|----------------------------------|-----------------------------------------------------------------------------------------------------------------------------------------------|
| <i>Smoke generator</i>           | VDP900HZ, HQ power                                                                                                                            |
| <i>Laser</i>                     | Dual SL454-10-OPG, Spectron Laser Systems, flashlamp pumped<br>Nd:YAG laser, 532nm, 200mJ/pulse, 13ns pulse duration, 15Hz<br>repetition rate |
| <i>Tachometer for triggering</i> | PLT200, Monarch Instrument                                                                                                                    |
| <i>Camera</i>                    | MegaPlusII ES 2020, Redlake, 30fps, 1600x1200px with 105mm<br>zoomlens, Nikkor Micro, Nikon                                                   |
| <i>Linear actuator</i>           | custom design, 5mm/stroke ball screw, AMS AM34-420-2-EFB<br>stepper motor and AMS MAX-410 controller                                          |

181



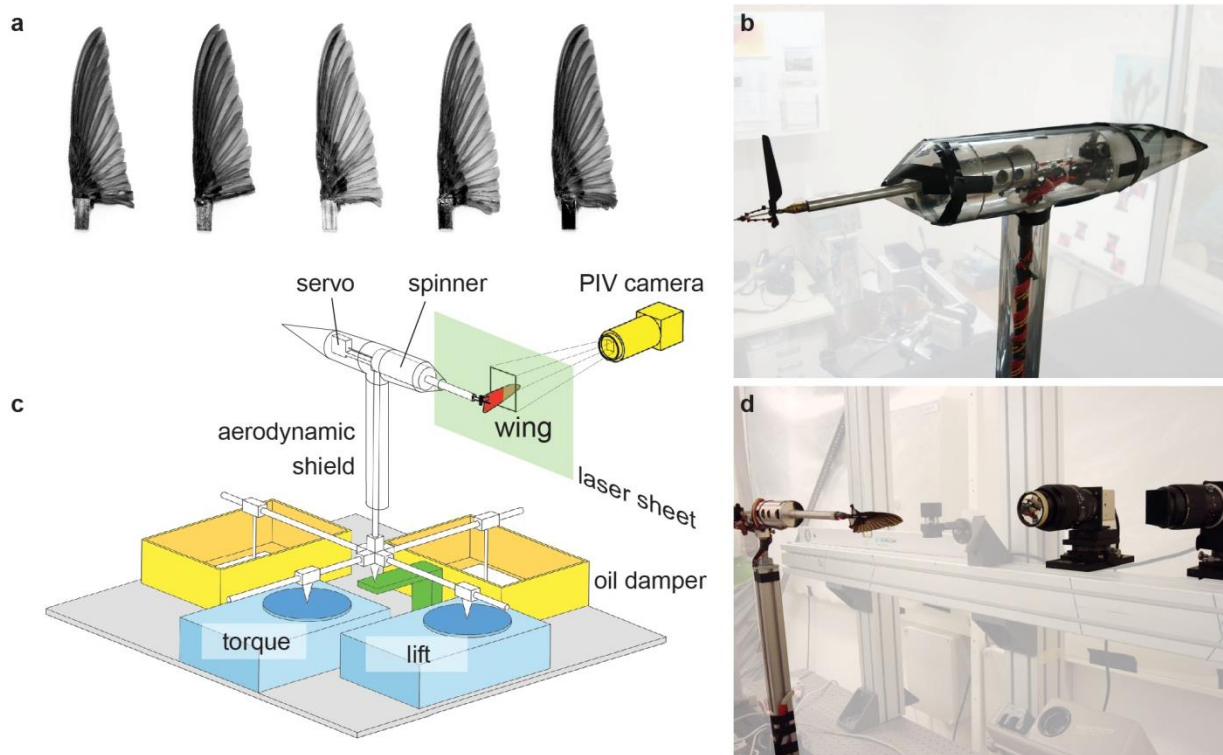

182  
 183 Figure S1. Hummingbird wings and spinner setup used for force measurements and quantitative flow  
 184 visualizations. (a) The right wings of five male Anna's hummingbirds (*Calypte anna*) were used for  
 185 force measurements; the left-most wing produced a force polar close to the species average and was  
 186 used during PIV measurements. Each wing is glued into a plastic mount that clamps onto the  
 187 spinner. (b, c) During force measurements the spinner was mounted on a balance pivoting on a  
 188 fulcrum (green) and supported by weighing scales (blue) to measure reaction forces. The setup's  
 189 center of gravity deliberately almost coincided with the pivoting point. The counterweight is  
 190 connected below the fulcrum (not shown here for clarity, it consists of a custom  $\square$ -shaped aluminum  
 191 connector that fits around the fulcrum). The balance was overdamped to measure time-averaged  
 192 forces. The spinner was also carefully shielded from propeller secondary flow using a separately  
 193 supported cowling (clear plastic). This cowling connected to a bottom plate (not visible) supported  
 194 by side plates that shielded the balance system from air currents. (d) Phase-locked image pairs were  
 195 recorded by a PIV-camera looking along the wing span during the PIV measurements. A second

196 camera under a 35° stereo angle assisted in determining the wing location in the flow field. The  
197 spinner was traversed laterally through the laser sheet using a linear actuator (not visible).  
198

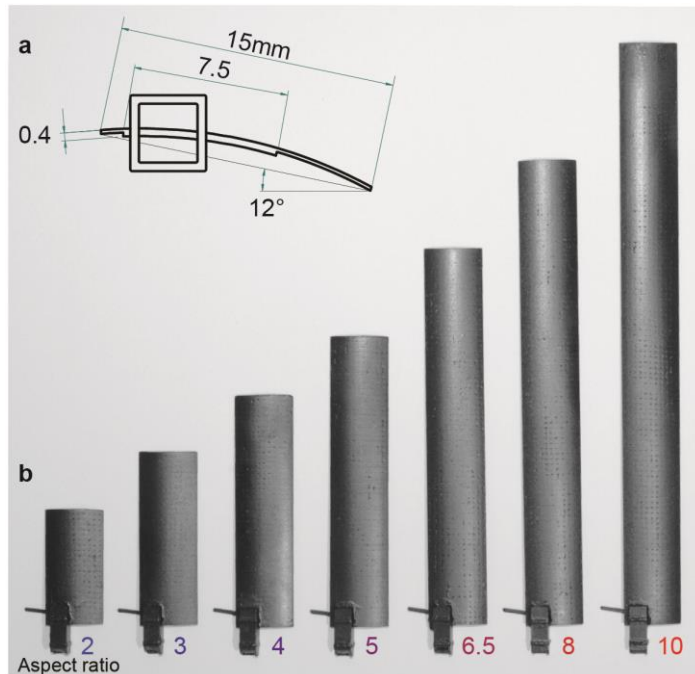

199  
200 Figure S2. Model wings with aspect ratios 2-10. Carbon fiber model wings were produced by  
201 ProxDynamics in Nesbru, Norway and used for force measurements and PIV. All wings were  
202 originally produced with aspect ratio 10 with constant chord and uniform airfoil. To lower aspect  
203 ratio, wing length was reduced using a table saw with a diamond-tipped blade. (a) The airfoil is built  
204 up from two 0.2mm carbon fiber plies with 6% camber and 15mm chord length. The airfoil design  
205 was iterated to eliminate flutter throughout the measurement range. (b) Each wing is glued into a  
206 small plastic mount at the quarter-chord point, which clamps onto the spinner. Small carbon fiber  
207 rods protruding from the wing base served as hooklets around which we tied small orthodontic  
208 rubber bands to secure each wing to the spinner.  
209

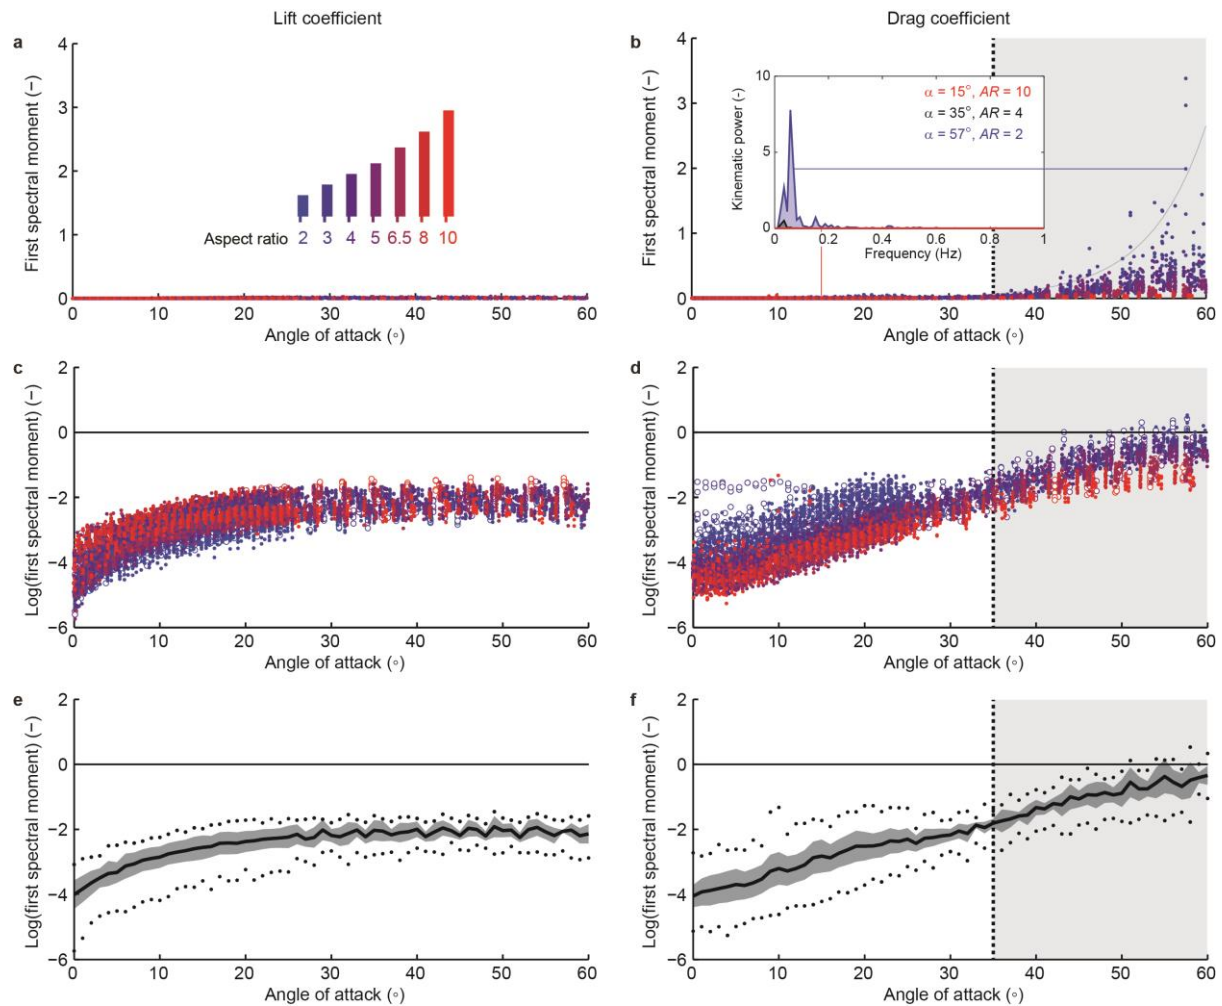

210  
 211  
 212 Figure S3. Low frequency fluctuations in the raw drag coefficient signal indicate measurement  
 213 limitations at  $Re = 5,000$  and for  $\alpha > 35^\circ$ . The power spectrum of the raw lift (left) and drag (right)  
 214 coefficient signal (sampling frequency 5-6Hz) was computed using a fast Fourier transform (mean  
 215 value subtracted; signal reflected at both end points) in the 0-1Hz frequency range, which contained  
 216 almost all power. We calculated the first spectral moment by integrating power  $\times$  frequency in this  
 217 range, which represents a frequency-weighted form of kinematic power. The kinematic power  
 218 contained in these low frequencies indicates whether system dynamics interfered with measurement  
 219 of setup deflection, which was calibrated to determine aerodynamic forces. The kinematic power of  
 220 the force coefficient series is non-dimensional. (a, c, e) Average kinematic power in the lift

221 coefficient series does not exceed 0.012 for  $\alpha=0-60^\circ$ , indicating all lift force measurements were  
222 within the steady range of the balance. **(b)** Kinematic power in the drag coefficient signal is  $0.017 \pm$   
223  $0.006$  around  $35^\circ$  incidence, and increases exponentially beyond acceptable levels at this angle. This is  
224 illustrated by the grey exponential fit through the maximum power at each incidence for  $30^\circ \leq \alpha \leq$   
225  $60^\circ$  ( $C_D = 10^{-3.52+0.0656\alpha}$ ,  $R^2 = 0.9168$ ). Since the setup was calibrated statically to measure steady  
226 forces, we disregarded all drag measurements beyond  $35^\circ$ , because these drag force measurements  
227 were within the dynamic range of the balance. The sub-panel shows representative spectra for  
228 different angles of attack, above  $35^\circ$  the drag spectra reveal balance dynamics. **(d)** The kinematic  
229 power in the drag coefficient signal is highest for low aspect ratio wings at  $Re$  5,000 both at low and  
230 high incidence. Model wings with aspect ratios 2–4 at Reynolds number 5,000 generate the smallest  
231 aerodynamic forces in this dataset, defining the range limitation of the setup. We therefore omitted  
232 the measurements at Reynolds number 5,000 from the analysis. Open dots plotted in c,d represent  
233  $Re$  5,000; closed dots  $Re$  9,000-25,000. **(e, f)** Average logarithmic power for all force coefficient  
234 measurements at  $Re \geq 9,000$  (thick black line: average, area: std, dots: min & max values).

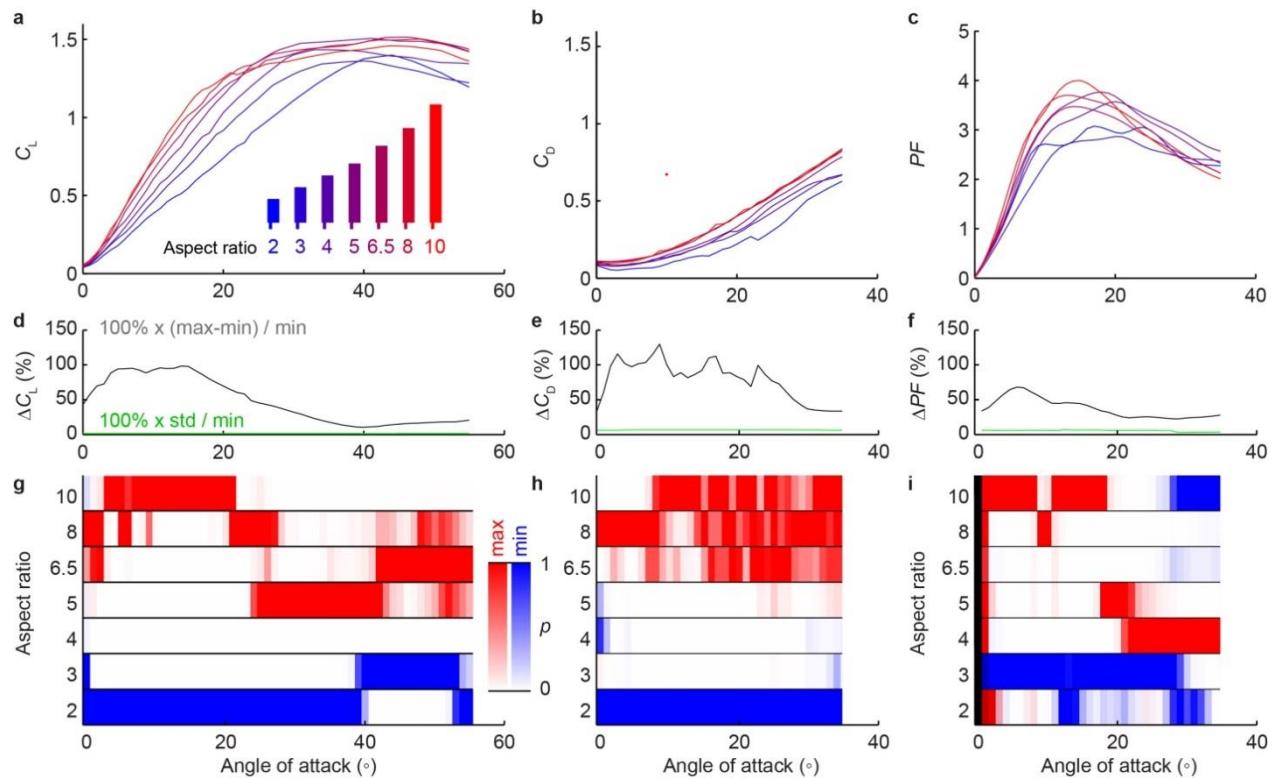

235

236 Figure S4. Aspect ratio effect on force coefficients at hummingbird midstroke  $Re = 13,000$  is similar  
 237 to the  $Re$  averaged effect shown in Figure 2. (a-c) Lift, drag and power factor versus angle of attack  
 238 as a function of aspect ratio. Aspect ratio 4 wings combine near maximal lift, and intermediate drag,  
 239 which maximizes power factor beyond  $20^\circ$ . A single outlying point for the drag coefficient is marked  
 240 as a dot (and ignored in  $Re$  average, Figure 2). The relative difference between minimum and  
 241 maximum lift (d), drag (e), and power factor (f) among wings is substantial (green line, std calibration  
 242 accuracy for reference). The optimal aspect ratio to obtain maximum (red) versus minimum (blue)  
 243 lift (g), drag (h), and power factor (i) depends on incidence. The color intensity corresponds with the  
 244 p-value of the Wilcoxon rank-sum test for aspect ratio at constant incidence. The effect of aspect  
 245 ratio on power factor at  $\alpha = 0^\circ$  could not be established due to numerical sensitivity to experimental  
 246 error near zero lift, which produced outliers that were disregarded (vertical black area at  $\alpha = 0^\circ$ ).

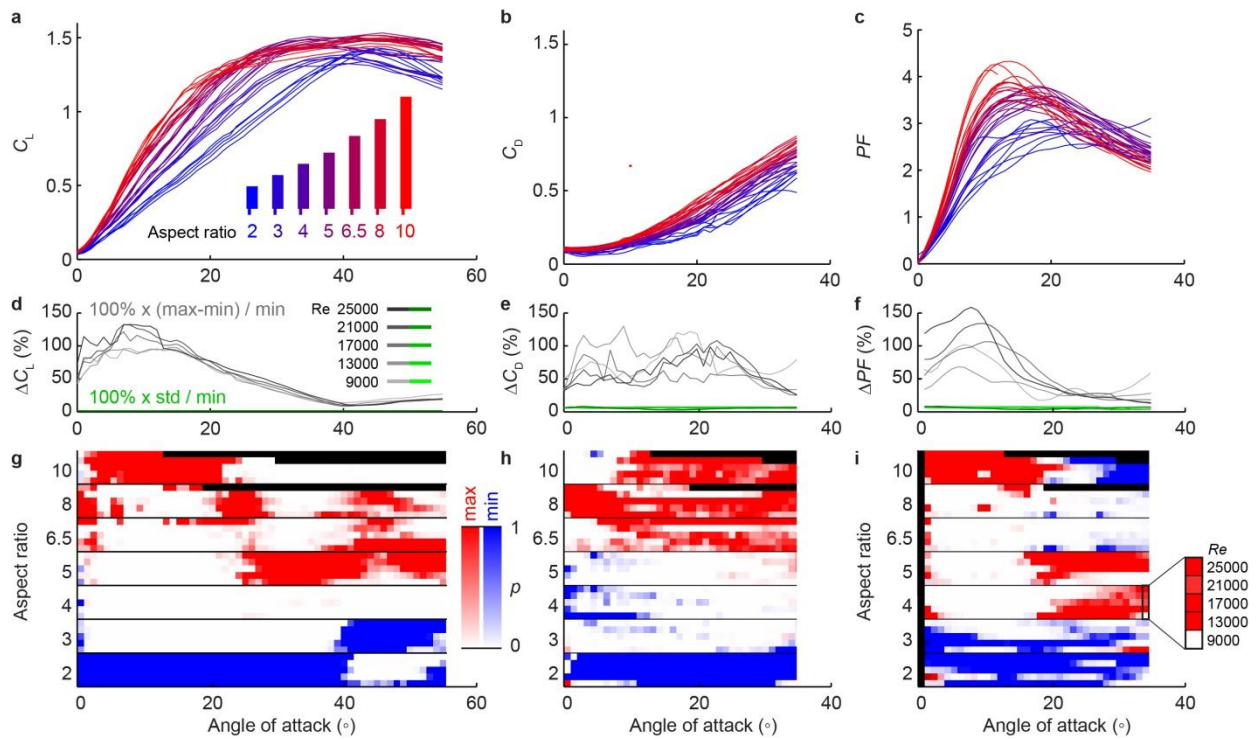

247

248 Figure S5. Reynolds number has limited effect on force coefficients across  $Re = 9,000-25,000$ . (a-c)

249 Lift, drag and power factor versus angle of attack as a function of aspect ratio. Aspect ratio 4 and 5

250 wings combine near maximal lift, and intermediate drag, which maximizes power factor beyond  $20^\circ$ .

251 A single outlying point for the drag coefficient is marked as a dot. The relative difference between

252 minimum and maximum lift (d), drag (e), and power factor (f) among wings is substantial (green line,

253 std calibration accuracy for reference). The optimal aspect ratio to obtain maximum (red) versus

254 minimum (blue) lift (g), drag (h), and power factor (i) depends on incidence. The color intensity

255 corresponds with the  $p$ -value of the Wilcoxon rank-sum test for aspect ratio at constant incidence.

256 Motor power limited the achievable incidence range for aspect ratio 8 and 10 wings at  $Re = 21,000-$

257  $25,000$  (horizontal black areas). The effect of aspect ratio on power factor at  $\alpha = 0^\circ$  could not be

258 established due to numerical sensitivity to experimental error near zero lift, which produced outliers

259 that were disregarded (vertical black area at  $\alpha = 0^\circ$ ).

260

261

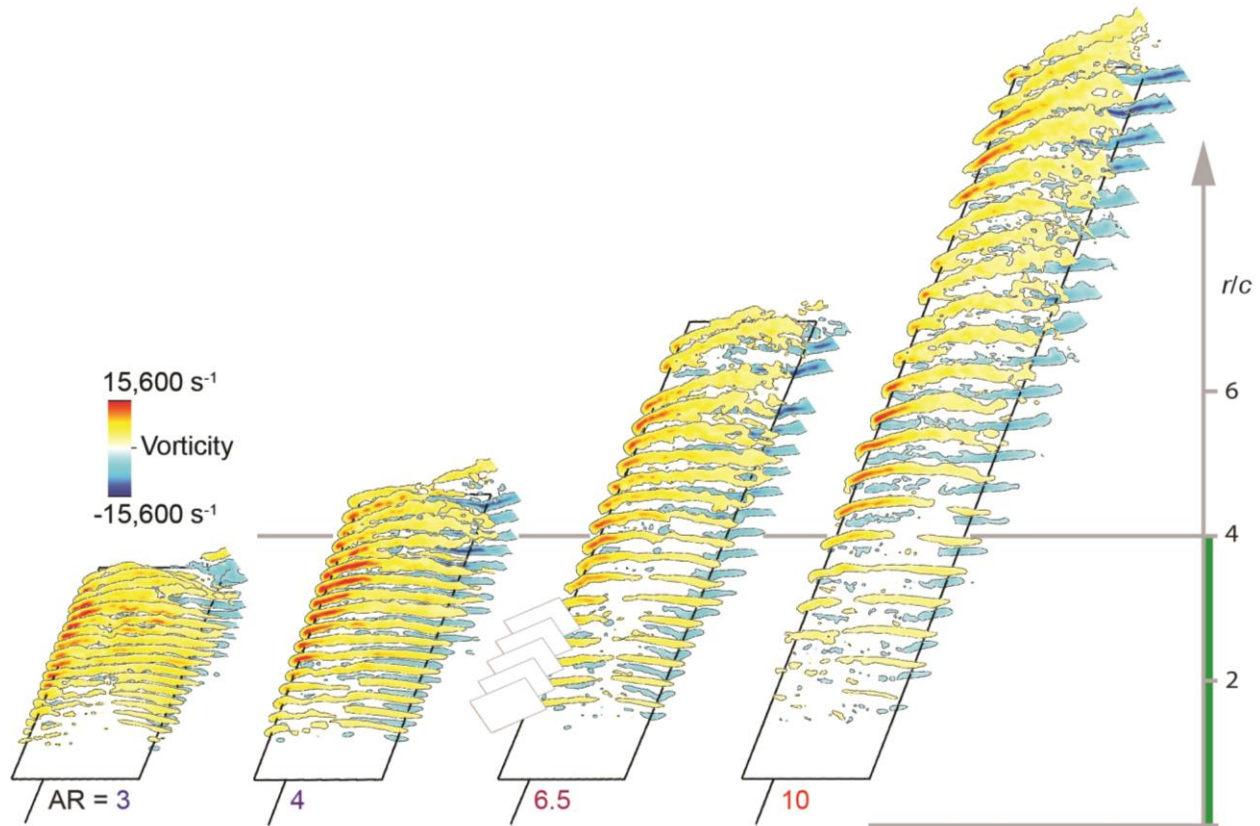

262

Figure S6. The leading edge vortex remains attached at radii up to 4 chord lengths at  $30^\circ$ . Average

263

vorticity concentration at  $Re = 13,000$  reveals an attached leading edge vortex inboard of  $r/c \sim 4$ .

264

Outboard vortices detach from the leading (yellow, red) and trailing edge (blue). We masked the

265

vorticity field on the inboard leading edge of the aspect ratio 6.5 wing because stove polish proved

266

unsuccessful to reduce background reflections on the plastic wing mount and carbon fiber hooklet in

267

those particular images. One flow field close to the tip of the aspect ratio 6.5 wing was not recorded

268

at  $30^\circ$  and is therefore not shown.

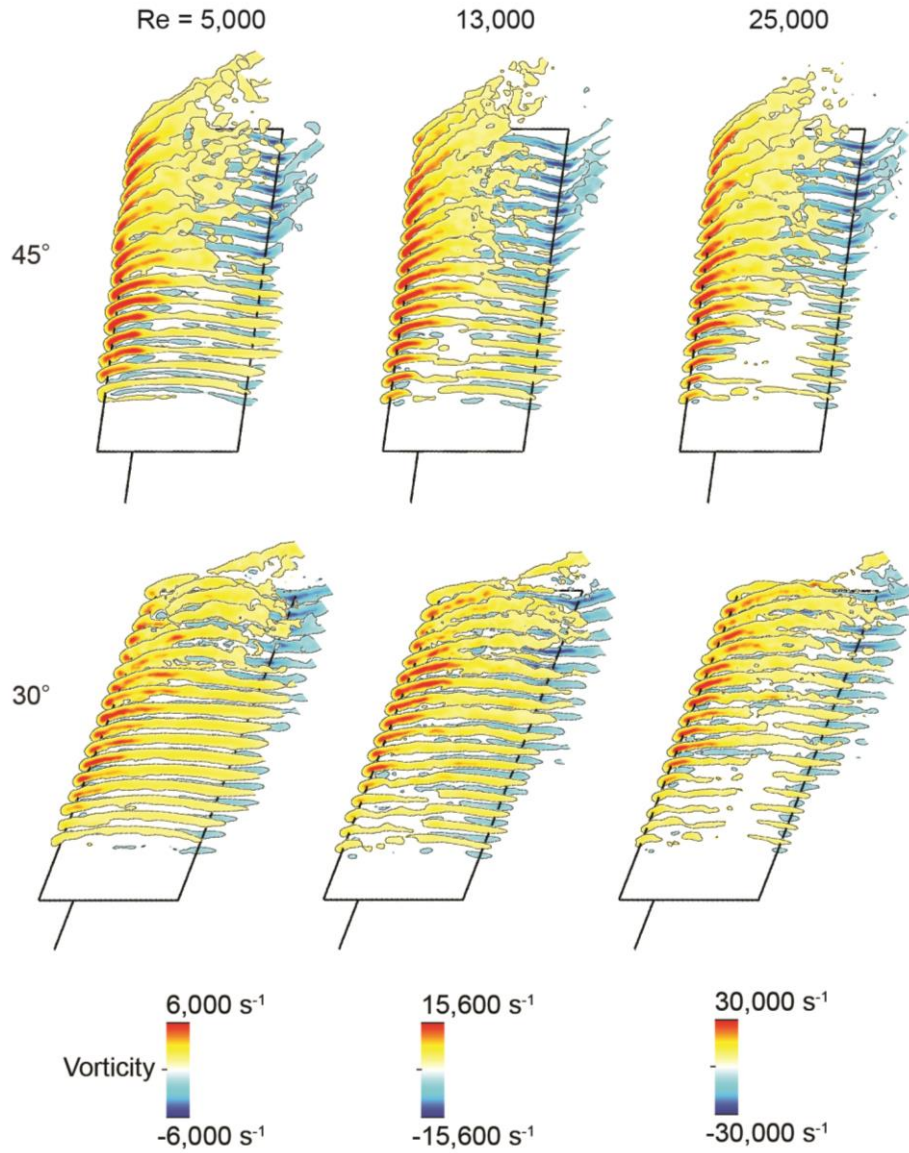

269  
 270 Figure S7. Reynolds number has limited effect on vorticity around an aspect ratio 4 wing across  $Re =$   
 271  $5,000-25,000$ . Average vorticity concentrations are similar for different  $Re$ , at both  $30^\circ$  and  $45^\circ$   
 272 incidence. A leading edge vortex attached to the inboard wing merges with the tip vortex outboard,  
 273 as shown for maple seeds <sup>23</sup>.

274

275



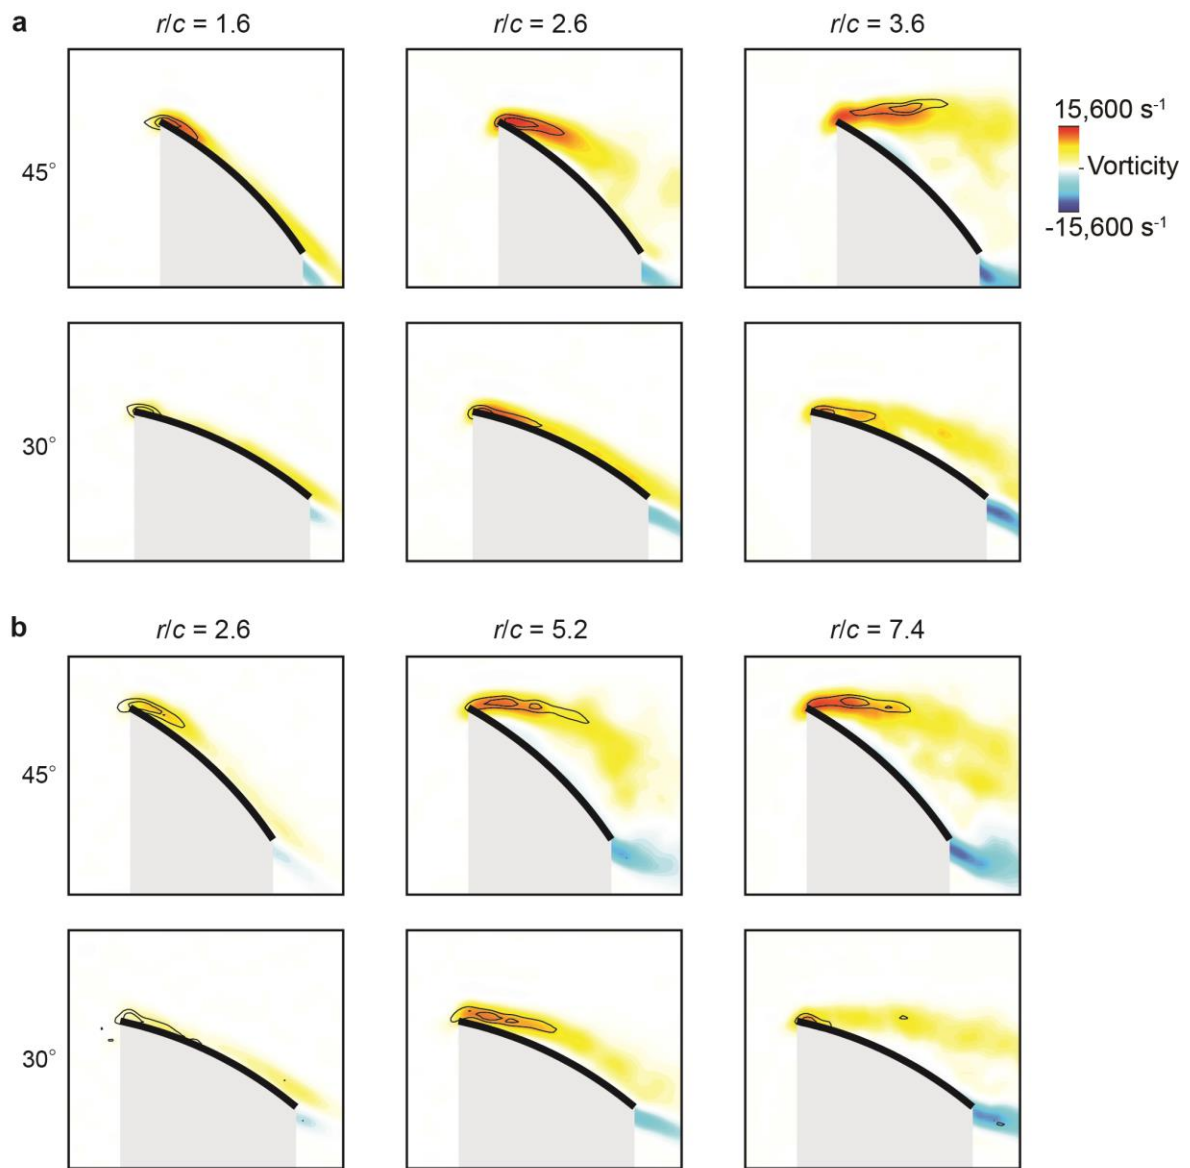

276  
 277 Figure S8. A non-local vortex detection scheme confirms that the leading edge vortex is either  
 278 attached to, or tilted away from, the surface as a function of radial position  $r / c$ . The vortex  
 279 identification results are similarly robust for (a), the aspect ratio 4 wing with  $R/c = 4.6$  and (b), the  
 280 aspect ratio 10 wing, with  $R/c = 10.6$ , at 30° and 45° incidence and  $Re = 13,000$ . The thin black  
 281 contour lines represent a non-local scalar measure for axisymmetric vortex intensity ( $\gamma = 0.4$   
 282 and  $\gamma = 0.6$ ), which coincide with the peaks in the average local vorticity field (shown as color  
 283 intensity in the background). Both the non-local vortex intensity and the local vorticity field show

284 that the LEV is attached to the wing surface inboard (low  $r/c$ ), and is detached from the surface  
 285 outboard (high  $r/c$ ). We thus conclude that our vorticity fields are sufficiently noise-free to detect  
 286 vortices based on vorticity concentration. The thick black lines show the model wing cross-section;  
 287 gray areas mask the area below the wing where the laser illumination was insufficient. The  
 288 axisymmetric vortex intensity at a point P in the velocity field is defined as  $\gamma(P) = \frac{1}{N} \sum \sin(\theta_M)$   
 289 following the work of Graftieaux *et al.*<sup>14</sup>, which was implemented using MATLAB code from Jones *et*  
 290 *al.*<sup>13</sup>.

291

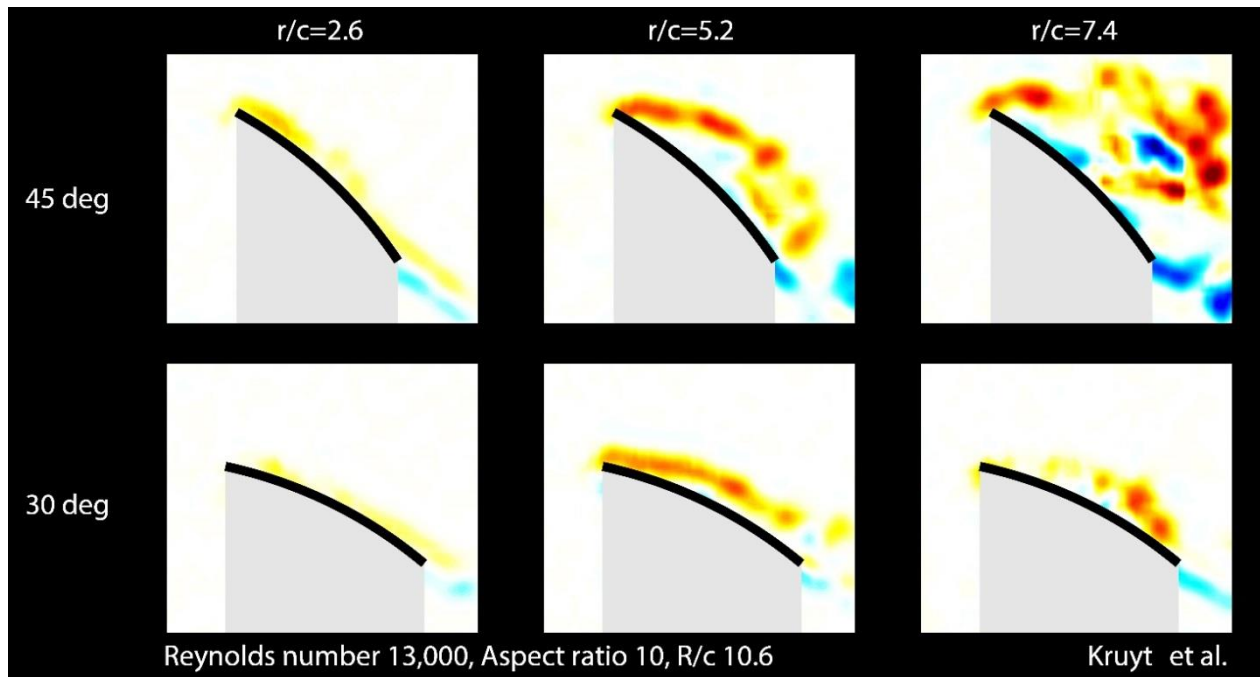

292

293 Movie S1 (still). Strong radial differences in LEV dynamics and flow separation are visible along the  
 294 wing. The movie shows a loop of twenty instantaneous vorticity fields at three spanwise stations on  
 295 an aspect ratio 10 model wing at 30° and 45° incidence. Inboard, the LEV is attached to the upper  
 296 wing surface, whereas outboard vortex shedding and strong flow separation reveal the leading edge  
 297 vortex is unsteady.

298

- 300 1 Lentink, D. & Dickinson, M. H. Rotational accelerations stabilize leading edge vortices on revolving fly wings.  
301 *J Exp Biol* **212**, 2705-2719, doi:10.1242/jeb.022269 (2009).
- 302 2 Hein, B. R. & Chopra, I. Hover performance of a micro air vehicle: rotors at low Reynolds number. *Journal of*  
303 *the American helicopter Society* **52**, 254-262 (2007).
- 304 3 Bohorquez, F., Pines, D. & Samuel, P. D. Small rotor design optimization using blade element momentum  
305 theory and hover tests. *Journal of aircraft* **47**, 268-283 (2010).
- 306 4 Harbig, R., Sheridan, J. & Thompson, M. Reynolds number and aspect ratio effects on the leading-edge vortex  
307 for rotating insect wing planforms. *Journal of Fluid Mechanics* **717**, 166-192 (2013).
- 308 5 Altshuler, D. L., Dudley, R. & Ellington, C. P. Aerodynamic forces of revolving hummingbird wings and wing  
309 models. *Journal of Zoology* **264**, 327-332 (2004 ).
- 310 6 Weis-Fogh, T. Quick estimates of flight fitness in hovering animals, including novel mechanisms for lift  
311 production. *Journal of Experimental Biology* **59**, 169-230 (1973).
- 312 7 White, F. M. *Viscous Fluid Flow*. (McGraw-Hill, 1991).
- 313 8 Usherwood, J. R. & Ellington, C. P. The aerodynamics of revolving wings I. Model hawkmoth wings. *J Exp*  
314 *Biol* **205**, 1547-1564 (2002).
- 315 9 Usherwood, J. R. & Ellington, C. P. The aerodynamics of revolving wings II. Propeller force coefficients from  
316 mayfly to quail. *J Exp Biol* **205**, 1565-1576 (2002).
- 317 10 Wang, Z. J. Aerodynamic efficiency of flapping flight: analysis of a two-stroke model. *Journal of Experimental*  
318 *Biology* **211**, 234-238 (2008).
- 319 11 Eilers, P. H. A perfect smoother. *Analytical Chemistry* **75**, 3631-3636 (2003).
- 320 12 Poelma, C., Dickson, W. & Dickinson, M. Time-resolved reconstruction of the full velocity field around a  
321 dynamically-scaled flapping wing. *Experiments in Fluids* **41**, 213-225 (2006).
- 322 13 Jones, A., Pitt Ford, C. & Babinsky, H. Three-dimensional effects on sliding and waving wings. *Journal of*  
323 *Aircraft* **48**, 633-644 (2011).
- 324 14 Graftieaux, L., Michard, M. & Grosjean, N. Combining PIV, POD and vortex identification algorithms for the  
325 study of unsteady turbulent swirling flows. *Measurement Science and Technology* **12**, 1422 (2001).
- 326 15 Unal, M., Lin, J.-C. & Rockwell, D. Force prediction by PIV imaging: a momentum-based approach. *Journal of*  
327 *Fluids and Structures* **11**, 965-971 (1997).
- 328 16 Wu, J.-Z., Pan, Z.-L. & Lu, X.-Y. Unsteady fluid-dynamic force solely in terms of control-surface integral.  
329 *Physics of Fluids (1994-present)* **17**, 098102 (2005).
- 330 17 Dabiri, J. O. On the estimation of swimming and flying forces from wake measurements. *Journal of*  
331 *Experimental Biology* **208**, 3519-3532 (2005).
- 332 18 Van Oudheusden, B., Scarano, F. & Casimiri, E. Non-intrusive load characterization of an airfoil using PIV.  
333 *Experiments in fluids* **40**, 988-992 (2006).
- 334 19 Wu, J.-Z., Lu, X.-Y. & Zhuang, L.-X. Integral force acting on a body due to local flow structures. *Journal of*  
335 *Fluid Mechanics* **576**, 265-286 (2007).
- 336 20 Spedding, G. R. & Hedenström, A. PIV-based investigations of animal flight. *Experiments in Fluids* **46**, 749-763  
337 (2009).
- 338 21 Van Oudheusden, B. PIV-based pressure measurement. *Measurement Science and Technology* **24**, 032001  
339 (2013).
- 340 22 Mohebbian, A. & Rival, D. E. Assessment of the derivative-moment transformation method for unsteady-load  
341 estimation. *Experiments in fluids* **53**, 319-330 (2012).
- 342 23 Lentink, D., Dickson, W. B., van Leeuwen, J. L. & Dickinson, M. H. Leading-Edge Vortices Elevate Lift of  
343 Autorotating Plant Seeds. *Science* **324**, 1438-1440, doi:10.1126/science.1174196 (2009).
- 344
- 345
